# Supplementary material
Source: publisher figshare collection journal article supplement (https://acs.figshare.com/ndownloader/files/3717655)
Supplement: Supplementary file 1 [file 3717655]

**Supporting information for**

**Continuous Cavitation Designed for Enhancing  
Radiofrequency Ablation *via* a Special Radiofrequency  
Solidoid Vaporization Process**

*Kun Zhang,<sup>†,¶</sup> Pei Li,<sup>†</sup> Hangrong Chen,<sup>‡</sup> Xiaowan Bo,<sup>†</sup> Xiaolong Li,<sup>†</sup> and Huixiong Xu<sup>\*†‡,¶</sup>*

<sup>†</sup>Department of Medical Ultrasound, Shanghai Tenth people's Hospital, Tongji University School of Medicine, 301 Yan-chang-zhong Road, Shanghai, 200072, P. R. China; <sup>‡</sup> State Key Laboratory of High Performance Ceramic and Superfine Microstructures, Shanghai Institute of Ceramics, Chinese Academy of Science; 1295 Ding-Xi Road, Shanghai, 200050, P. R. China; <sup>¶</sup> Ultrasound Research and Education Institute, Tongji University School of Medicine, 301 Yan-chang-zhong Road, Shanghai, 200072, P. R. China.

\* Address correspondence to [xuhuixiong@126.com](mailto:xuhuixiong@126.com)

**Materials.** Poly (lactic-co-glycolic acid) (50:50) with the molecular weight of 15,000 MW is purchased from Polyscience, USA. 1,1'-Dioctadecyl-3,3,3',3'-tetramethyl-4,4'-bipyridinium perchlorate (Dil), DL-menthol (DLM) and Poly(vinyl alcohol) (PVA, MW=89,000-98,000) are purchased from Sigma-Aldrich. The chloroform and ethanol are purchased from Sinopharm Chemical Reagent Co., Ltd. Deionized water was used in all experiments.

**Characterizations.** TEM images were obtained by using JEM 2100 F electron microscope operating at 100 kV, and SEM images were obtained on a field-emission JEOL JSM-6700F microscope. The thermo-gravimetric (TG) and differential thermal analysis (DTA) are obtained by NETZSCH STA 449C. Hydrodynamic particle size is monitored by Zetasizer (Malvern, Nano-ZS90). Confocal images were obtained by using Olympus confocal microscopy. Radiofrequency ablation was conducted on a bipolar radiofrequency instrument, OLYMPUS Celon system (T20). Images and video of contrast-enhanced ultrasound imaging were obtained by using GE LogiQ E9 system with a 8 MHz transducer and Esaote MyLab™90 with a 10 MHz linear transducer, respectively. Thermal infrared images were obtained by using FLIR Sc300-Series. Confocal images were acquired on the OLYMPUS fluoview FV1000.

## Supplementary Figures

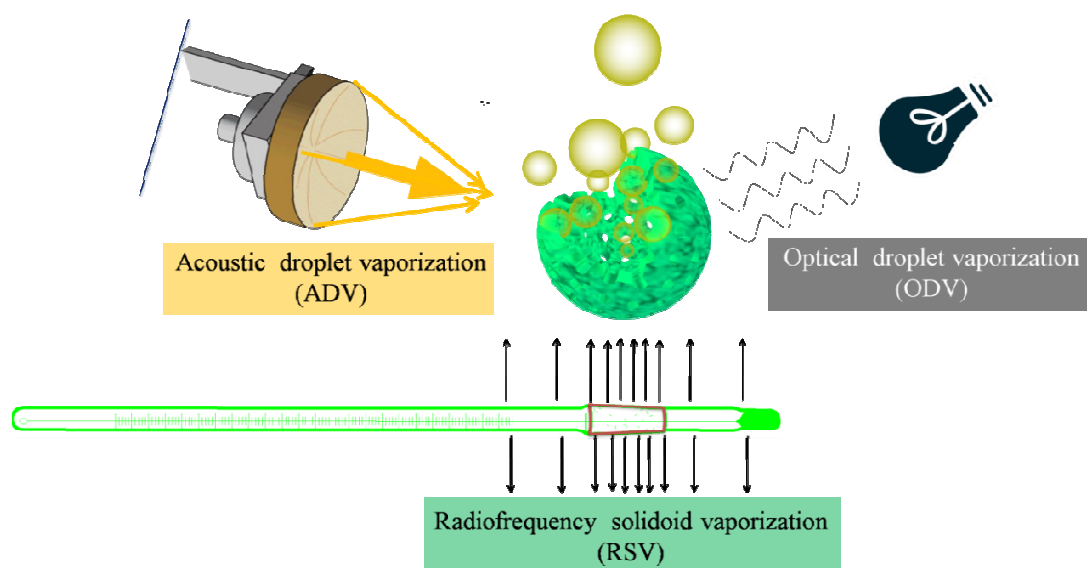

**Figure S1.** Schematic illustrations of ADV, ODV and RSV processes.

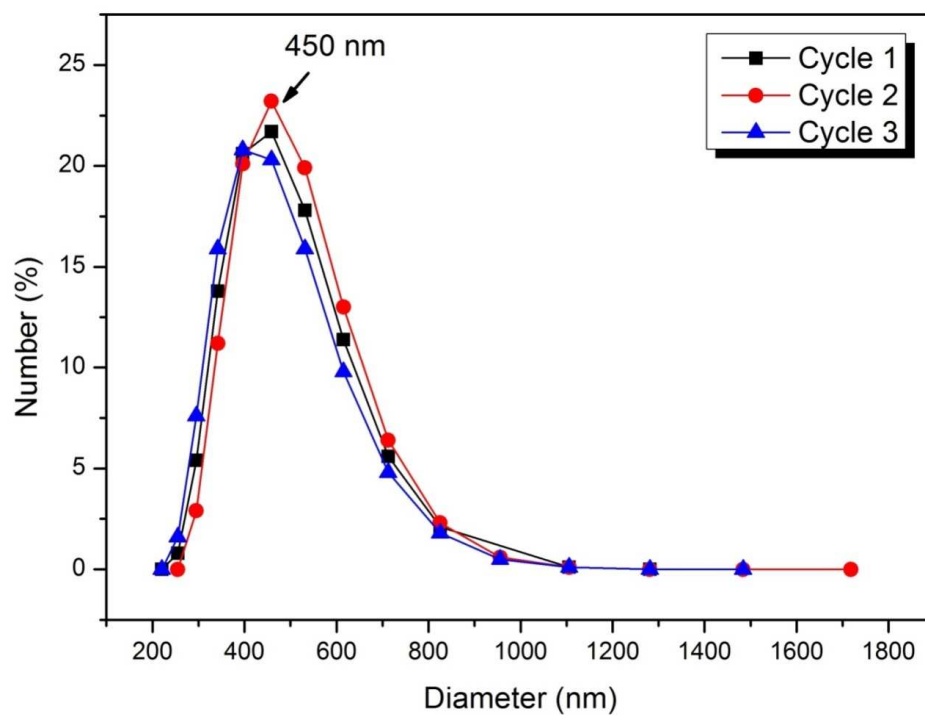

**Figure S2.** Particle size distribution of DLM@PLGA *via* the dynamic light scattering (DLS) method repeated for 3 times.

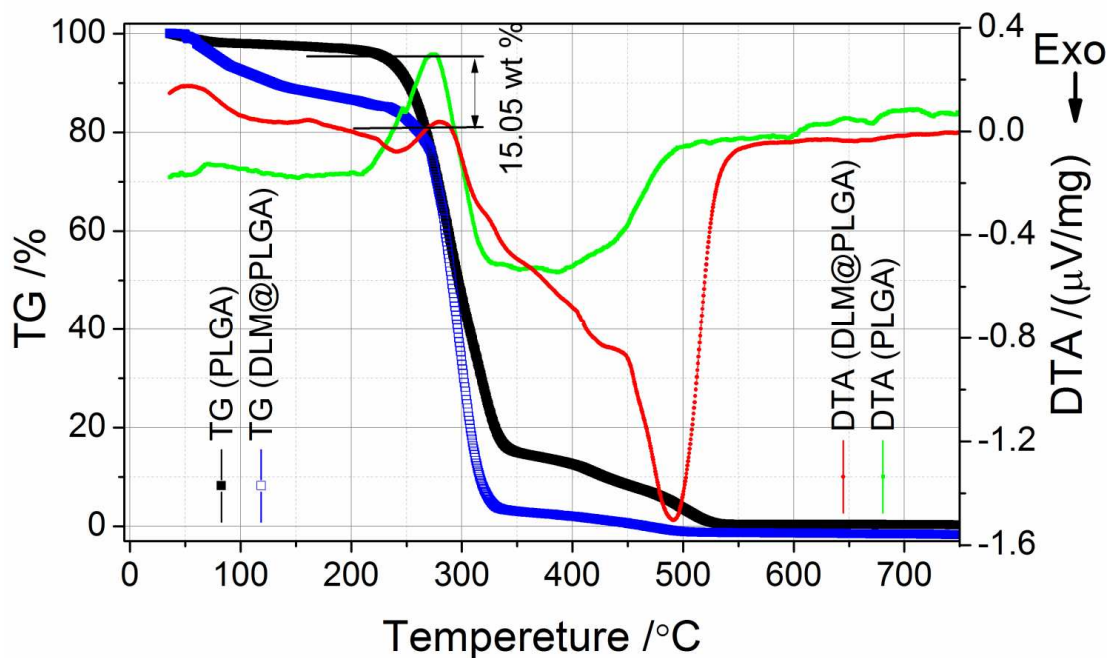

**Figure S3.** TG and DTA data of PLGA and DLM@PLGA with a heating rate of 10 °C/min, wherein the evident differences in profiles of TG and DTA between PLGA and DLM@PLGA show the successful loading of DLM in DLM@PLGA. Additionally, below 200 °C, DLM@PLGA still exhibits a heat absorption process, while PLGA displays an exothermic process. This phenomenon shows the RSV process is always present below 200 °C, which can promote continuous cavitation effect beneficial for the following contrast-enhanced ultrasound imaging and enhanced RF ablation.



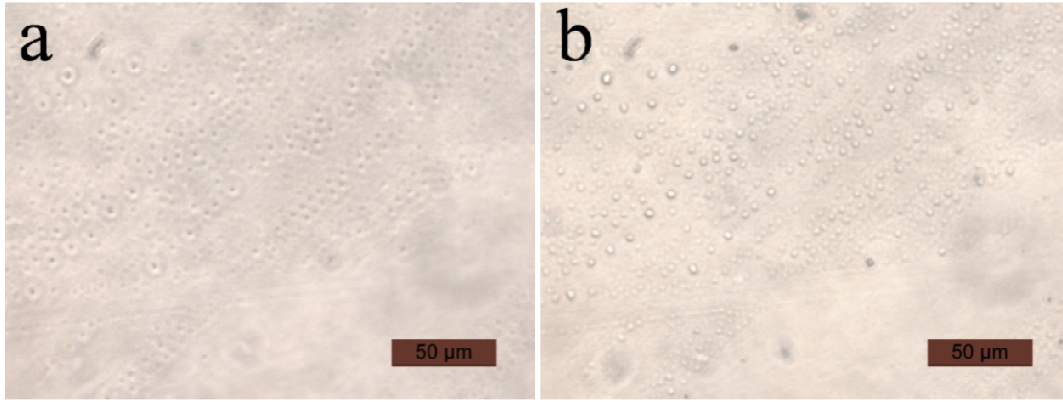

**Figure S4.** *In-situ* observation of RSV process. (a,b) Optical microscopic image of DLM@PLGA nanocapsules before (a) and after (b) RF heating.

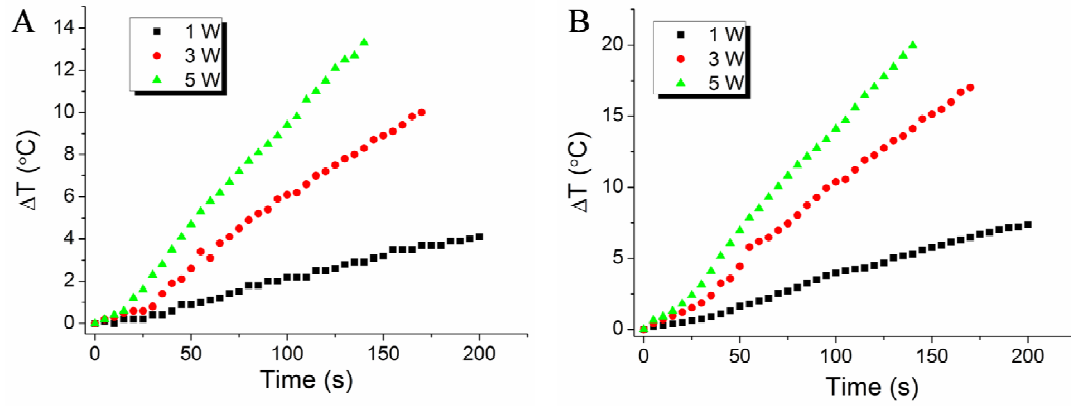

**Figure S5.** *In vitro* temperature variation profiles of egg albumen colloidal solution without (A) and with (B) adding DLM@PLGA (10 mg/mL) nanocapsules as a function of time exposure to RF irradiations.

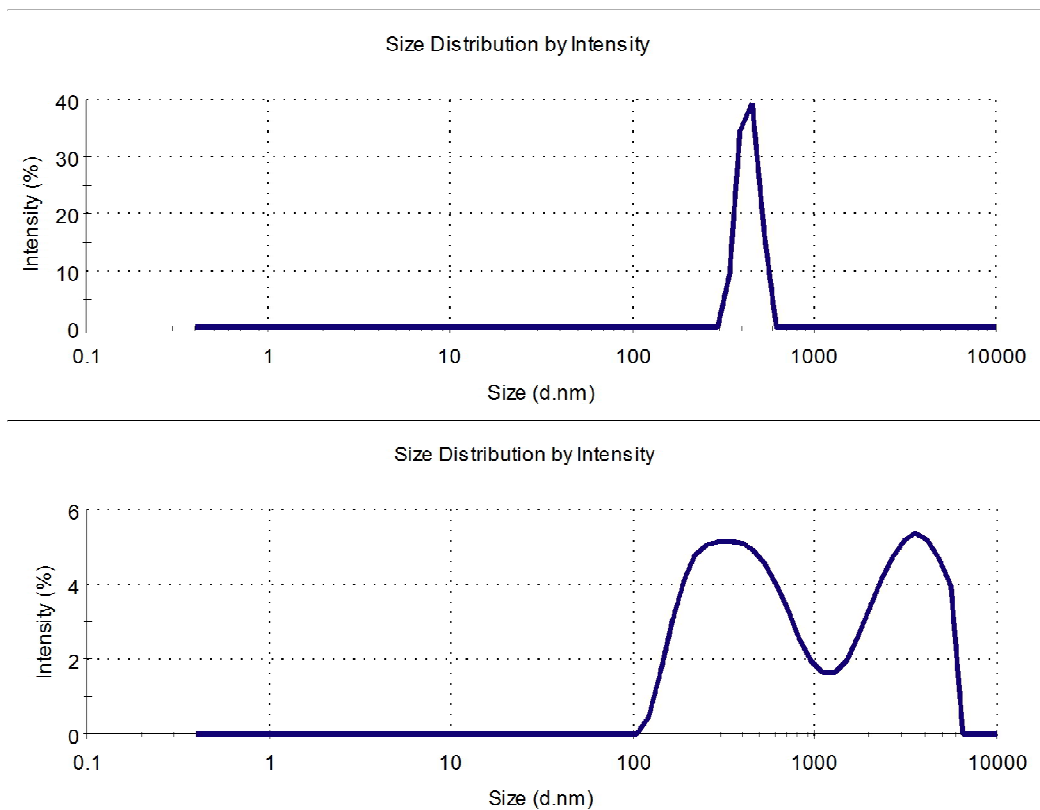

**Figure S6.** Particle size distribution of DLM@PLGA before and after RF heating *via* DLS method.

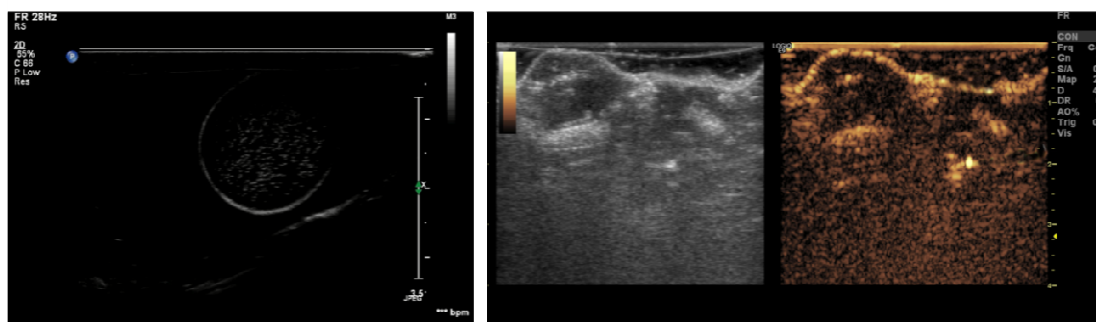

**Figure S7.** (a) *In vitro* ultrasonic image of free liquid DLM and (b) *in vivo* ultrasonic image of Helix solid tumor after intratumorally injecting free liquid DLM.

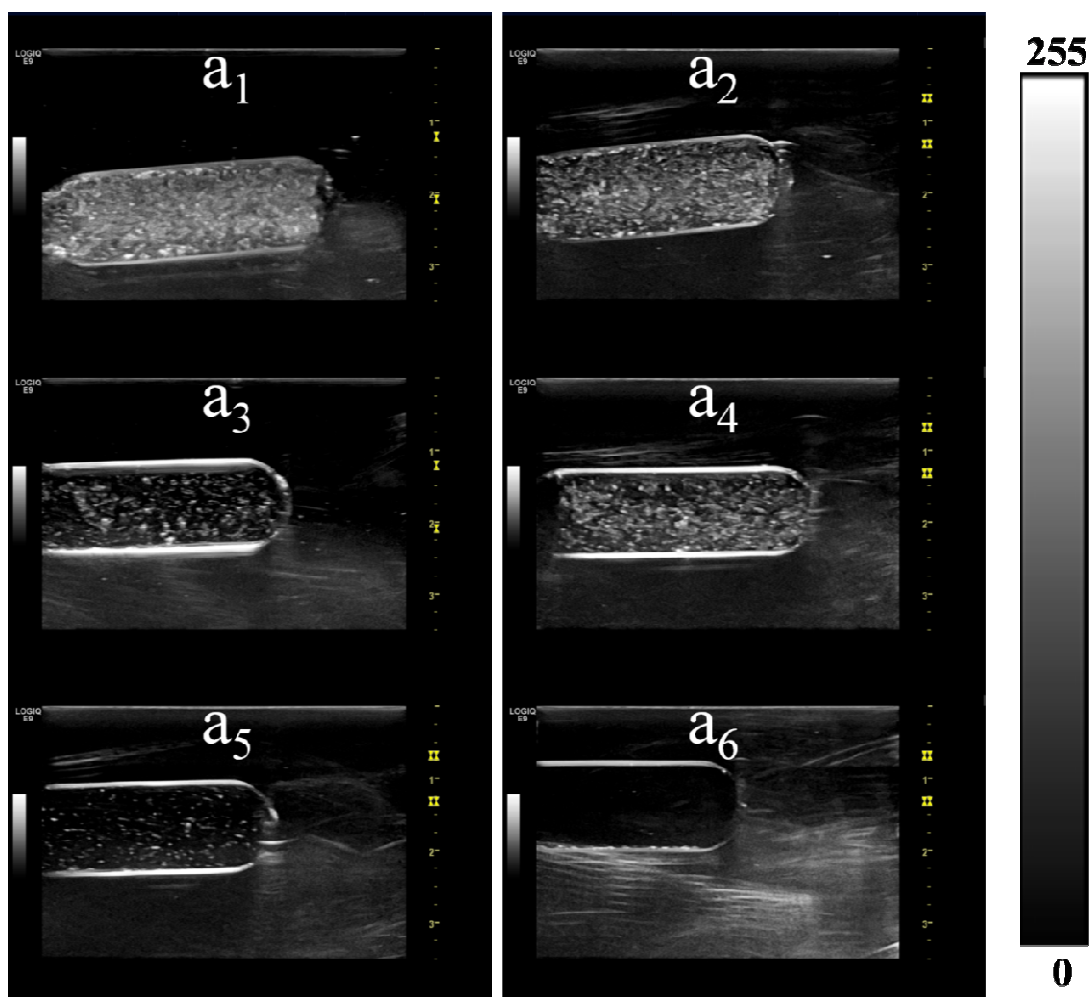

**Figure S8.** Ultrasonic images of DLM@PLGA after RSV process mediated by RF irradiations with varied mass concentrations of 10 mg/mL ( $a_1$ ), 8 mg/mL ( $a_2$ ), 6 mg/mL ( $a_4$ ), 4 mg/mL ( $a_3$ ), 2 mg/mL ( $a_5$ ) and 0 mg/mL ( $a_6$ ).

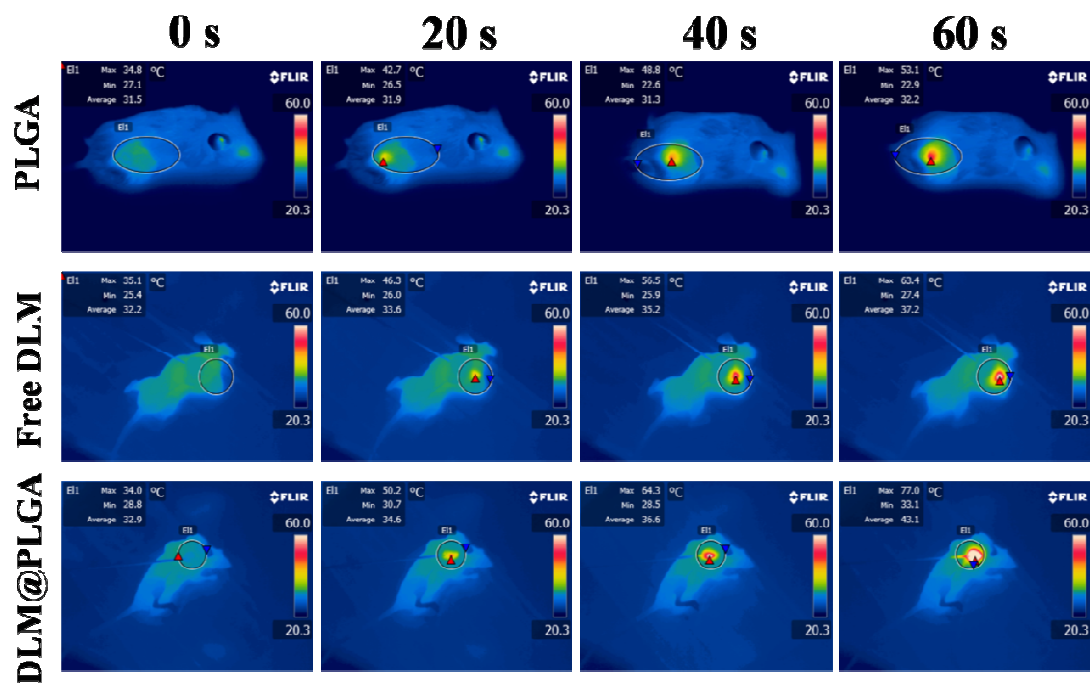

**Figure S9.** *In vivo* thermal infrared images of Hela xenografted tumor implanted female nude mice after intratumorally injecting PLGA dispersion, free liquid DLM and DLM@PLGA dispersion, which can monitor the *in vivo* temperature variation as a function of irradiation time.

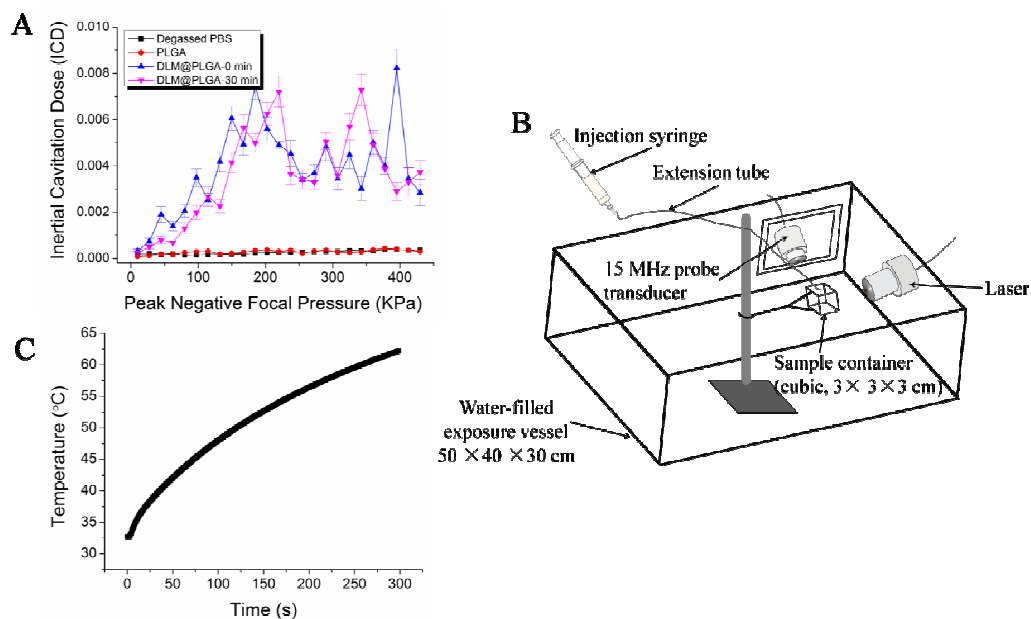

**Figure S10.** Measurement of inertial cavitation dose (ICD) characterizing inertial cavitation. (A) Inertial cavitation dose (ICD) of PBS, PLGA and DLM@PLGA instantly measured once exposure to laser irradiations and 30-min delay.

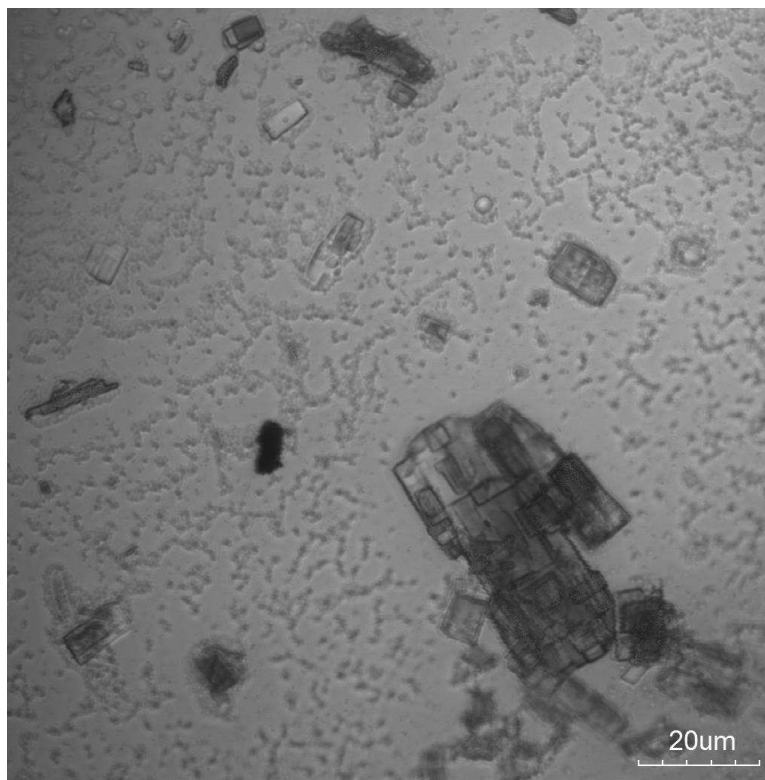

**Figure S11.** Bright-field confocal image of the mixture consisting of free Liquid DLM and DLM@PLGA nanocapsules dispersed in PBS, and the mixture was subjected to drastic ultra-high velocity homogenization.

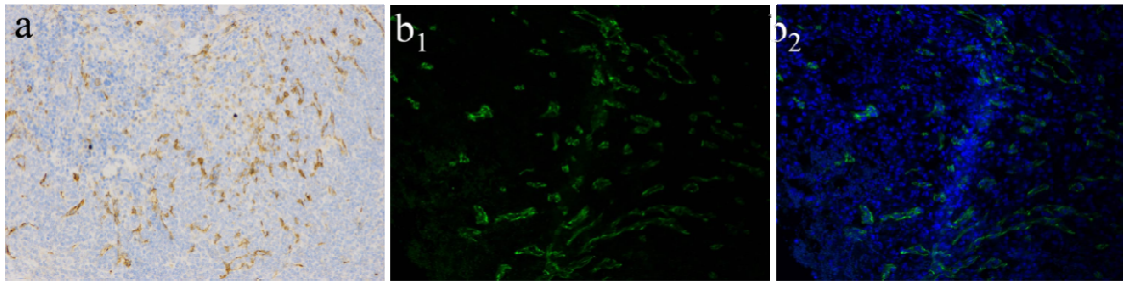

**Figure S12.** (a) Optical microscopic image of Hela solid tumor stained by CD34 immunohistochemistry, and the matured vessels were stained by brown color (positive expression); (b<sub>1</sub>, b<sub>2</sub>) Confocal microscopic images of Hela solid tumor stained by FITC-CD31 immunofluorescence, notes: b<sub>1</sub> is the FITC channel that directly represents CD31 expression and reflects the newborn vessels, and b<sub>2</sub> is the merged channel of FITC and DAPI that stained cell nuclei.

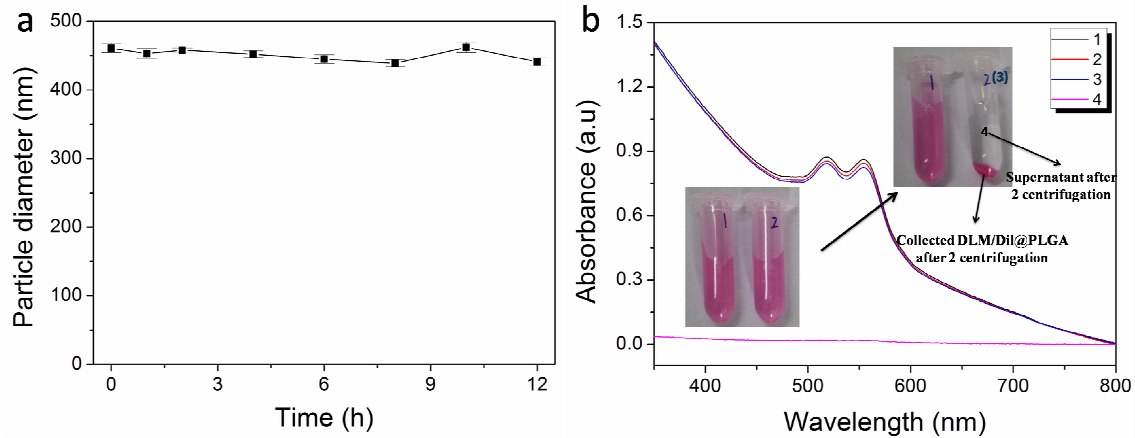

**Figure S13.** (a) Time-dependent size distribution of DLM/Dil@PLGA nanocapsules obtained via DLS method, and no evident size variation suggests the excellent structural stability of DLM/Dil@PLGA nanocapsules. (b) UV-vis spectra and digital photos of DLM/Dil@PLGA nanocapsules with different treatments: 1 represents the DLM/Dil@PLGA SBF dispersion at time node = 0 h, 2 represents the DLM/Dil@PLGA SBF dispersion at time node = 12 h, 3 represents the re-dispersion of DLM/Dil@PLGA nanocapsules collected after 2 centrifugation in SBF solution, and 4 represents the supernatant after 2 centrifugation. Negligible UV-vis spectrum difference of 1-3 suggests no Dil release from DLM/Dil@PLGA nanocapsules, and no evident red color and no characteristic peak of Dil in digital photo and spectrum 4 further demonstrate no Dil disassembly from DLM/Dil@PLGA nanocapsules.



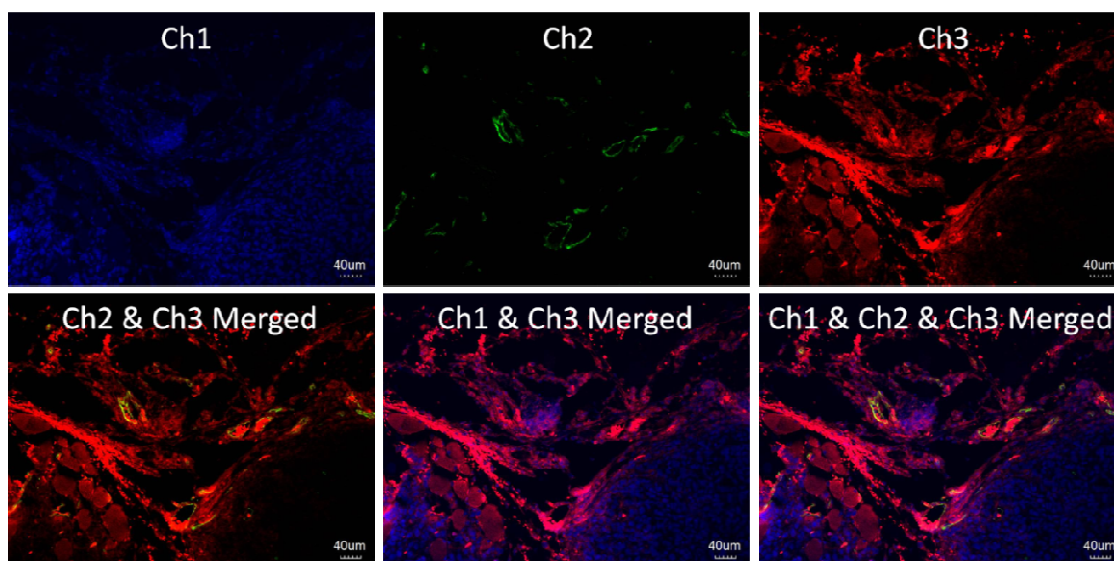

**Figure S14.** Confocal microscopic images of Hela tumor after intravenous injection of DLM/Dil@PLGA nanocapsules for 2 h, Ch1-Ch3 represent DAPI that characterize tumor cell, CD31-FITC that reflect the vessels in tumor and Dil that reflect the distribution of DLM/Dil@PLGA nanocapsules, and it is clearly found that Dil can traverse the blood vessel and enter intercellular space and even tumor cells from the bottom three merged images.



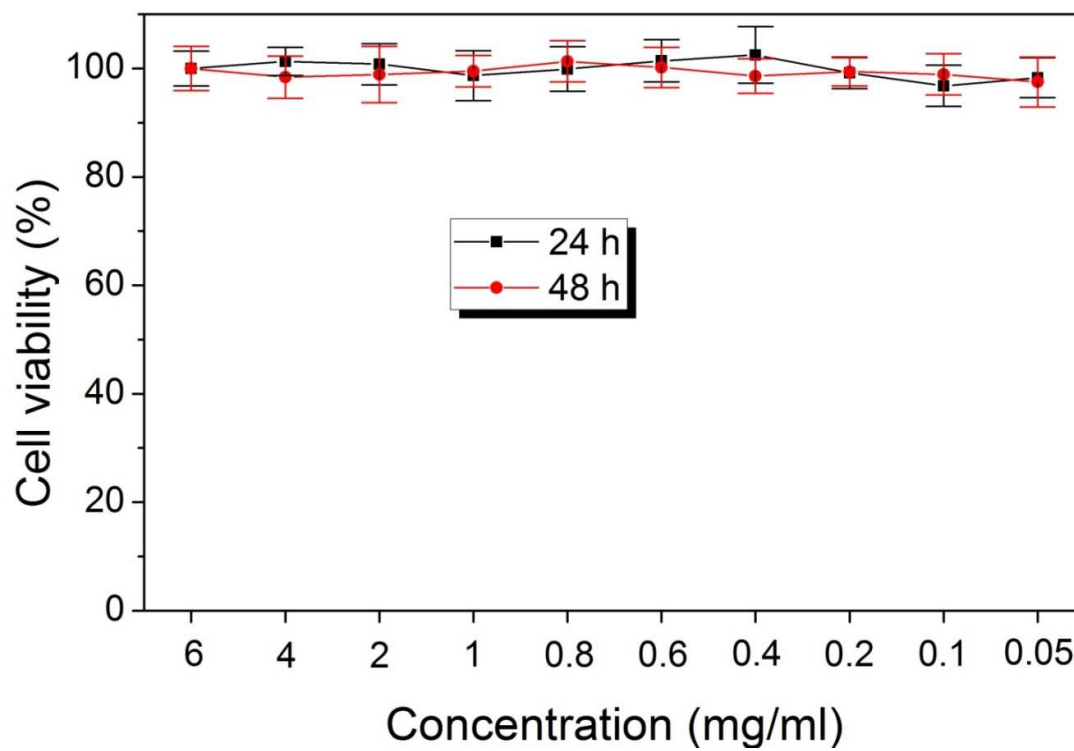

**Figure S15.** Cell viability of Fibroblast cells L929 treated with different DLM@PLGA nanocapsules for 24 h.

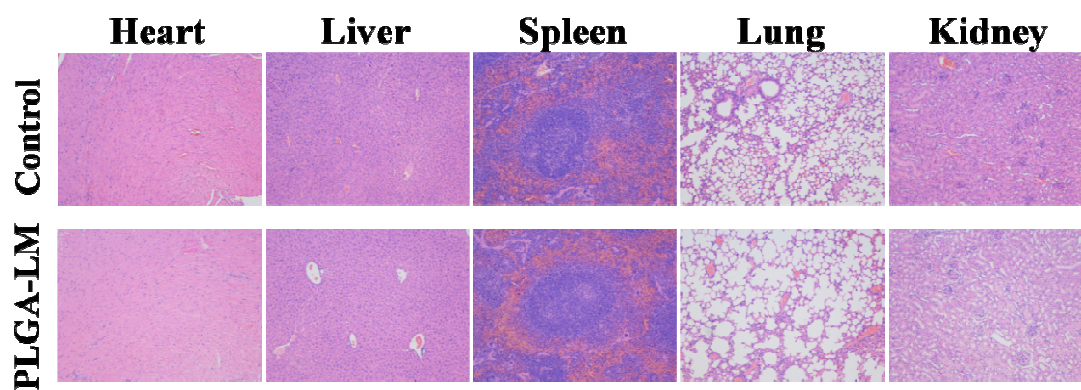

**Figure S16.** Optical microscopic images of normal organs (heart, liver, spleen, lung and kidney, stained by H&E) of nude mice after intravenously injecting PBS and DLM@PLGA nanocapsules.

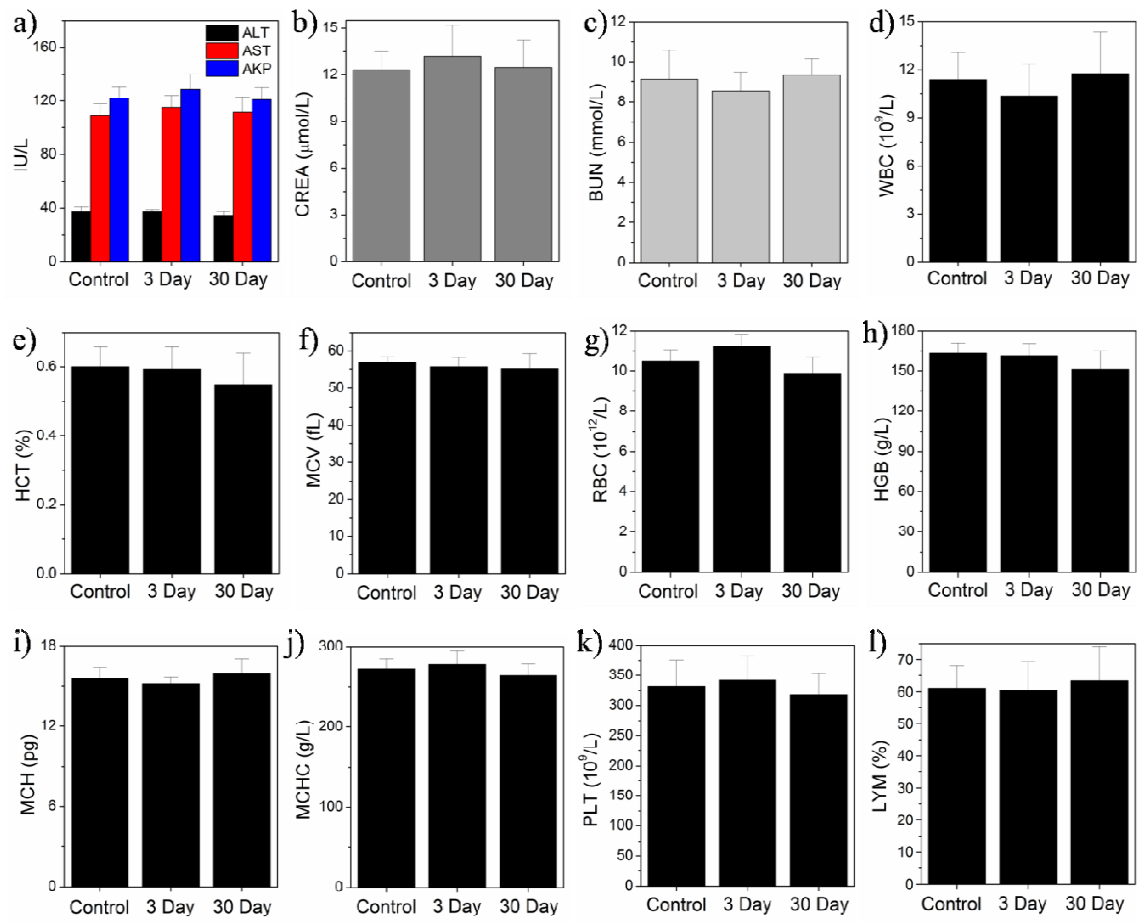

**Figure S17.** *In vivo* blood and biochemical indexes of nude mice after intravenous injection of DLM@PLGA nanocapsules for different periods.

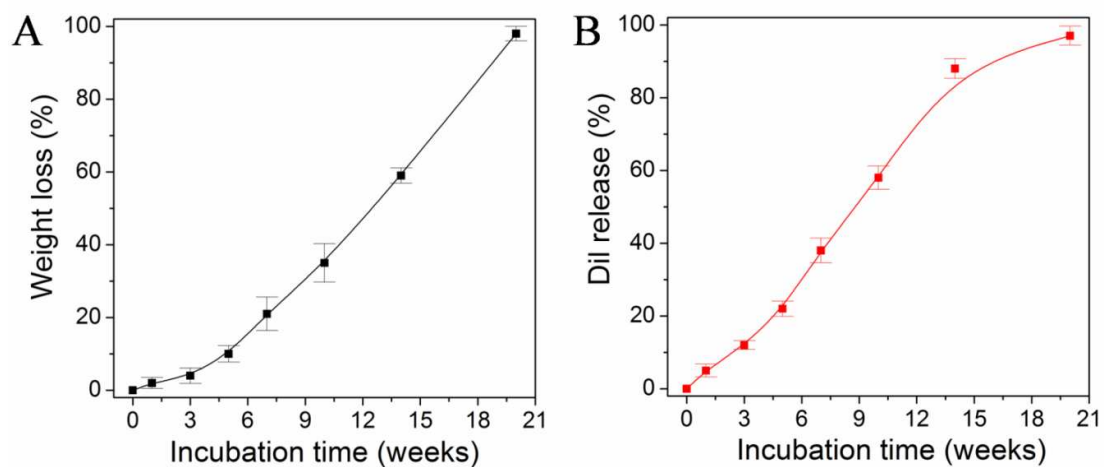

**Figure S18.** (A) Degradability of DLM@PLGA in simulated body fluid (SBF) solution as a function of incubation time, and (B) Dil release profile from DLM/Dil@PLGA nanocapsules in SBF solution as a function of incubation time.
